# Supplementary material
Source: PubMed Central journal article supplement (PMC4502585)
Supplement: NIHMS697205-supplement-Supplemental_Data.pdf [file NIHMS697205-supplement-Supplemental_Data.pdf]

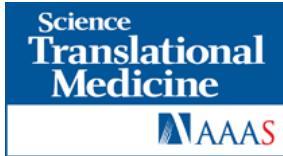

## Supplementary Materials for

### **Marburg virus infection in nonhuman primates: Therapeutic treatment by lipid-encapsulated siRNA**

Emily P. Thi, Chad E. Mire, Raul Ursic-Bedoya, Joan B. Geisbert, Amy C. H. Lee, Krystle N. Agans, Marjorie Robbins, Daniel J. Deer, Karla A. Fenton, Ian MacLachlan,\* Thomas W. Geisbert\*

\*Corresponding author. E-mail: [twgeisbe@utmb.edu](mailto:twgeisbe@utmb.edu) (T.W.G.); [IMacLachlan@tekmirapharm.com](mailto:IMacLachlan@tekmirapharm.com) (I.M.)

Published 20 August 2014, *Sci. Transl. Med.* **6**, 250ra116 (2014)  
DOI: 10.1126/scitranslmed.3009706

#### **The PDF file includes:**

Fig. S1. NP-718m–LNP RNAi mechanism of action confirmation.

Fig. S2. Clinical pathology parameters of MARV HF in NP-718m–LNP–treated, untreated, and Luc LNP–administered animals.

Table S1. Hematology results.

Table S2. Clinical chemistry results.

A

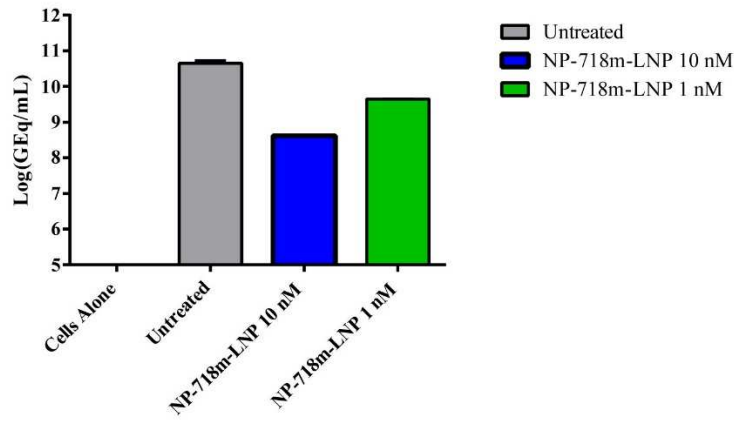

B

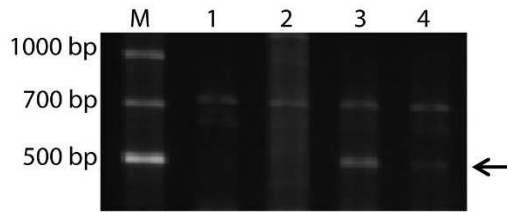

C 5' GAUUCUCAGGACUUCUUAUUG 3' NP 718m siRNA  
 3' AUCUAAGAGUCCUGAAGAAUA 5'

**5' RACE PCR Product Sequence**

mRNA Cleavage site  
 ↓

RNA Adaptor

CGACTGGAGCACGAGGACACTGGACTGAAGGAGTAGAAA GACTTCTTATTGTGA  
 AAACAGTTCTCGAGTTCATCTTGCAAAAACTGATTCAGGGGTGACACTACATCCTTTGG  
 TGCGGACCTCCAAAGTGAAAAACGAAGTTGCTAGTTTCAAGCAGGCGTTGAGCAACTTAG  
 CCCGACACGGAGAGTACGCACCAATTTGCACGGGTTTTGAATTTATCAGGGATTAACAATC  
 TCGAACATGGACTCTATCCTCAGCTCTCAGCAATTGCGCTGGGTGTAGCGACAGCACATG  
 GCAGTACATTGGCTGGTGTCAATGTCGGCGAACAATATCAACAGCTACGAGAGGCAGCAC  
 ATGATGCAGAAGTAAAAC TACAAAGACGACATGAACATCAGGAAATTC AAGCTATTGCCG  
 AAGATGACGAGGAAAGGAAGATATAGAACAAT

**Fig. S1.** NP-718m–LNP RNAi mechanism of action confirmation. HepG2 cells were treated with NP-718m-LNP (10 nM and 1 nM) for 24 h and then infected with MARV Angola at an MOI of 0.1. Supernatants and cells were harvested 24 h post-infection and subjected to (A) qRT-PCR to assess reduction in viral replication, data shown are means  $\pm$  SEM; and (B) 5'-RACE PCR to confirm the production of mRNA cleavage products of the expected size (505 bp). (C) Sequencing of 5'-RACE PCR confirms the expected mRNA cleavage site dictated by positions 10 and 11 of the guide siRNA strand.

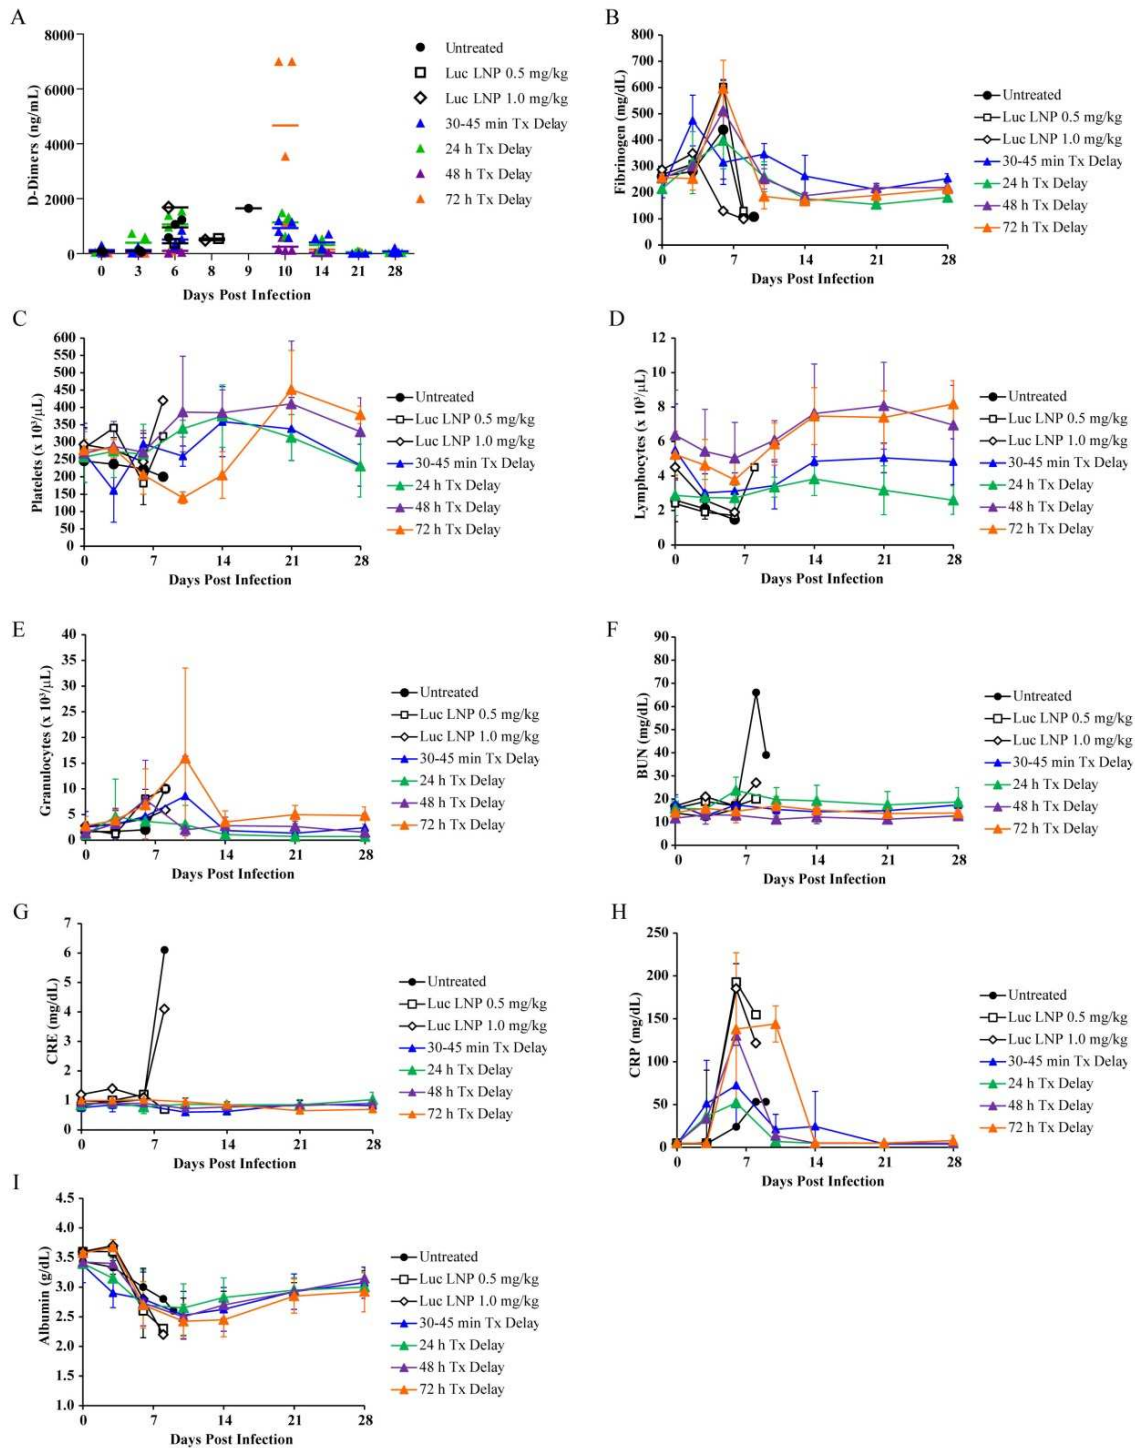

**Fig. S2.** Clinical pathology parameters of MARV HF in NP-718m-LNP-treated, untreated and Luc LNP-administered animals. (A) D-dimers; (B) Fibrinogen; (C) Platelets; (D) Lymphocytes; (E) Granulocytes; (F) Blood urea nitrogen (BUN); (G) Creatinine (CRE); (H) C-reactive protein (CRP); (I) Albumin. All graphs depict means  $\pm$  SD, with the exception of (A) where means are depicted only.

**Supplementary Table 1: Hematology results.**

| Subj. No. | Group   | Day PI   | WBC  | RBC  | HgB  | HCT  | PLT | Lymph | %Lymph | MCV  | MCH  | MCHC | MO  | GR   | %MO  | %GR  | %RDW | MPV  |
|-----------|---------|----------|------|------|------|------|-----|-------|--------|------|------|------|-----|------|------|------|------|------|
| 0308904   | Control | Prebleed | 4.1  | 4.61 | 11.9 | 35.5 | 356 | 1.4   | 35.1   | 76.9 | 25.8 | 33.5 | 0.3 | 2.3  | 7.7  | 57.2 | 12.7 | 8.3  |
| 0308904   | Control | 3        | 4.0  | 4.57 | 11.5 | 35.0 | 324 | 1.5   | 37.8   | 76.5 | 25.0 | 32.7 | 0.4 | 2.1  | 9.8  | 52.4 | 12.9 | 8.4  |
| 0308904   | Control | 6        | 4.2  | 4.27 | 10.9 | 32.3 | 340 | 1.5   | 34.6   | 75.7 | 25.5 | 33.7 | 0.1 | 2.6  | 2.4  | 63.0 | 12.8 | 8.1  |
| 0904099   | Control | Prebleed | 9.0  | 5.59 | 13.0 | 39.9 | 288 | 4.5   | 49.9   | 71.4 | 23.3 | 32.6 | 1.0 | 3.5  | 11.3 | 38.8 | 14.1 | 9.3  |
| 0904099   | Control | 3        | 4.1  | 4.45 | 10.7 | 32.7 | 203 | 2.7   | 66.5   | 73.6 | 24.1 | 32.7 | 0.3 | 1.0  | 8.4  | 25.1 | 13.3 | 9.3  |
| 0904099   | Control | 6        | 3.4  | 4.40 | 10.7 | 32.2 | 180 | 1.4   | 40.4   | 73.2 | 24.3 | 33.1 | 0.2 | 1.8  | 6.4  | 53.2 | 13.3 | 8.7  |
| 0904099   | Control | 8        | 18.4 | 4.97 | 12.3 | 37.3 | 343 | NR    | NR     | 75.0 | 24.7 | 32.9 | NR  | NR   | NR   | NR   | 14.4 | 9.3  |
| 0707061   | Control | Prebleed | 6.5  | 5.41 | 13.3 | 37.1 | 214 | 3.9   | 59.9   | 68.7 | 24.6 | 35.8 | 0.4 | 2.2  | 6.4  | 33.7 | 13.1 | 9.7  |
| 0707061   | Control | 3        | 4.6  | 4.88 | 11.3 | 33.1 | 182 | 2.1   | 45.7   | 67.9 | 23.1 | 34.1 | 0.5 | 2.0  | 10.1 | 44.2 | 13.4 | 9.3  |
| 0707061   | Control | 6        | 3.6  | 4.99 | 11.4 | 34.1 | 148 | 1.5   | 41.7   | 68.5 | 22.9 | 33.4 | 0.4 | 1.7  | 10.1 | 48.2 | 13.3 | 9.3  |
| 0707061   | Control | 9        | 19.6 | 4.26 | 10.0 | 29.5 | 200 | 8.1   | 41.1   | 69.2 | 23.5 | 33.9 | 1.6 | 10.0 | 8.0  | 50.9 | 13.7 | 9.2  |
| 0907042   | Control | Prebleed | 4.8  | 3.37 | 8.8  | 25.8 | 283 | 2.4   | 49.8   | 76.3 | 26.2 | 34.3 | 0.4 | 2.1  | 7.4  | 42.8 | 11.9 | 7.6  |
| 0907042   | Control | 3        | 3.7  | 3.70 | 9.5  | 28.0 | 341 | 1.9   | 50.0   | 75.6 | 25.6 | 33.9 | 0.7 | 1.2  | 17.6 | 32.4 | 11.9 | 7.5  |
| 0907042   | Control | 6        | 10.8 | 3.52 | 8.9  | 26.3 | 181 | 1.7   | 16.1   | 74.7 | 25.4 | 34.0 | 0.9 | 8.1  | 8.5  | 75.4 | 11.6 | 7.8  |
| 0907042   | Control | 8        | 10.6 | 3.49 | 9.1  | 25.5 | 317 | 4.5   | 42.8   | 73.0 | 26.1 | 35.7 | 0.2 | 5.9  | 1.6  | 55.6 | 11.8 | 7.8  |
| 0903269   | Control | Prebleed | 8.0  | 5.66 | 14.1 | 41.3 | 293 | 4.5   | 56.1   | 73.0 | 25.0 | 34.2 | 0.7 | 2.8  | 8.9  | 35.0 | 13.2 | 7.2  |
| 0903269   | Control | 3        | 7.0  | 5.92 | 13.8 | 42.5 | 278 | 2.6   | 37.8   | 71.8 | 23.4 | 32.6 | 1.2 | 3.1  | 17.8 | 44.4 | 13.4 | 6.8  |
| 0903269   | Control | 6        | 6.3  | 5.68 | 13.4 | 39.5 | 243 | 1.9   | 30.2   | 69.4 | 23.6 | 34.0 | 0.2 | 4.2  | 2.7  | 67.1 | 13.8 | 6.9  |
| 0903269   | Control | 8        | 41.2 | 5.62 | 13.7 | 40.6 | 420 | NR    | NR     | 72.1 | 24.3 | 33.8 | NR  | NR   | NR   | NR   | 14.2 | 8.3  |
| 0908097   | 30-45   | Prebleed | 10.1 | 5.92 | 14.3 | 43.5 | 214 | 2.9   | 29.2   | 73.5 | 24.1 | 32.8 | 0.7 | 6.4  | 7.1  | 63.7 | 13.4 | 9.1  |
| 0908097   | 30-45   | 3        | 7.9  | 4.32 | 10.5 | 31.5 | 137 | 1.9   | 24.0   | 73.1 | 24.3 | 33.2 | 0.8 | 5.2  | 10.2 | 65.8 | 13.6 | 9.5  |
| 0908097   | 30-45   | 6        | 4.3  | 3.89 | 9.5  | 28.4 | 286 | 2.5   | 57.0   | 73.0 | 24.4 | 33.5 | 0.3 | 1.6  | 6.7  | 36.3 | 14.0 | 9.0  |
| 0908097   | 30-45   | 10       | 4.2  | 4.08 | 9.9  | 29.6 | 239 | 1.5   | 36.7   | 72.5 | 24.2 | 33.3 | 0.2 | 2.5  | 4.5  | 58.8 | 14.5 | 9.1  |
| 0908097   | 30-45   | 14       | 6.8  | 3.83 | 9.2  | 27.4 | 233 | 4.8   | 70.3   | 71.5 | 24.0 | 33.6 | 1.1 | 0.9  | 15.8 | 13.9 | 14.1 | 10.5 |
| 0908097   | 30-45   | 21       | 7.8  | 4.66 | 11.2 | 34.3 | 278 | 6.1   | 78.3   | 73.4 | 24.1 | 32.8 | 0.7 | 1.0  | 8.5  | 13.2 | 14.4 | 9.8  |
| 0908097   | 30-45   | 28       | 7.0  | 4.88 | 11.7 | 35.6 | 192 | 5.0   | 71.2   | 73.1 | 24.1 | 33.0 | 0.7 | 1.3  | 10.4 | 18.4 | 14.4 | 9.6  |
| 08083572  | 30-45   | Prebleed | 6.9  | 4.39 | 11.1 | 33.3 | 275 | 4.0   | 57.3   | 75.8 | 25.2 | 33.2 | 0.6 | 2.4  | 8.2  | 34.5 | 12.9 | 8.8  |
| 08083572  | 30-45   | 3        | 3.9  | 4.00 | 10.1 | 30.0 | 42  | 2.3   | 58.0   | 75.0 | 25.2 | 33.6 | 0.5 | 1.1  | 12.8 | 29.2 | 12.2 | 9.4  |
| 08083572  | 30-45   | 6        | 4.0  | 4.43 | 11.1 | 33.8 | 313 | 2.0   | 48.9   | 76.1 | 25.1 | 33.0 | 0.2 | 1.8  | 5.9  | 45.2 | 12.8 | 8.4  |
| 08083572  | 30-45   | 10       | 6.4  | 4.48 | 11.3 | 33.7 | 301 | 4.1   | 64.7   | 75.2 | 25.2 | 33.5 | 0.6 | 1.7  | 9.4  | 25.9 | 12.6 | 8.6  |
| 08083572  | 30-45   | 14       | 7.5  | 4.22 | 10.6 | 31.5 | 339 | 5.0   | 66.6   | 74.7 | 25.2 | 33.8 | 0.6 | 1.9  | 8.6  | 24.8 | 12.6 | 8.7  |
| 08083572  | 30-45   | 21       | 6.2  | 4.18 | 10.5 | 31.4 | 285 | 4.0   | 64.4   | 75.0 | 25.1 | 33.5 | 0.7 | 1.5  | 10.6 | 25.0 | 12.8 | 8.9  |
| 08083572  | 30-45   | 28       | 5.3  | 2.97 | 7.4  | 22.5 | 205 | 2.9   | 55.4   | 75.7 | 24.9 | 32.8 | 0.6 | 1.7  | 11.9 | 32.7 | 12.8 | 8.4  |
| 0906057   | 30-45   | Prebleed | 5.4  | 3.87 | 9.9  | 29.0 | 243 | 4.4   | 81.5   | 75.0 | 25.6 | 34.2 | 0.5 | 0.5  | 9.3  | 9.2  | 13.4 | 8.4  |
| 0906057   | 30-45   | 3        | 4.5  | 3.58 | 9.2  | 26.6 | 217 | 3.7   | 82.1   | 74.5 | 25.6 | 34.4 | 0.3 | 0.5  | 6.3  | 11.6 | 13.3 | 8.7  |
| 0906057   | 30-45   | 6        | 6.9  | 4.40 | 11.0 | 32.7 | 273 | 3.7   | 54.1   | 74.4 | 25.0 | 33.6 | 0.5 | 2.7  | 6.9  | 39.0 | 13.3 | 8.3  |
| 0906057   | 30-45   | 10       | 21.9 | 5.12 | 12.1 | 36.1 | 239 | 3.6   | 16.5   | 70.4 | 23.7 | 33.7 | 0.9 | 17.4 | 4.0  | 79.5 | 12.5 | 8.8  |
| 0906057   | 30-45   | 14       | 5.1  | 4.34 | 10.6 | 31.7 | 390 | 4.5   | 88.5   | 73.0 | 24.5 | 33.5 | 0.3 | 0.3  | 6.3  | 5.2  | 13.3 | 8.5  |

| Subj. No. | Group | Day PI   | WBC  | RBC  | HgB  | HCT  | PLT | Lymph | %Lymph | MCV  | MCH  | MCHC | MO  | GR   | %MO  | %GR  | %RDW | MPV  |
|-----------|-------|----------|------|------|------|------|-----|-------|--------|------|------|------|-----|------|------|------|------|------|
| 0906057   | 30-45 | 21       | 5.8  | 4.26 | 10.4 | 31.2 | 317 | 5.1   | 87.7   | 73.4 | 24.4 | 33.3 | 0.3 | 0.4  | 5.2  | 7.1  | 13.4 | 8.9  |
| 0906057   | 30-45 | 28       | 6.3  | 4.36 | 10.7 | 32.1 | 214 | 5.5   | 87.6   | 73.6 | 24.5 | 33.3 | 0.4 | 0.4  | 6.6  | 5.8  | 13.9 | 9.0  |
| R080062   | 30-45 | Prebleed | 21.5 | 4.39 | 11.7 | 34.7 | 381 | 9.5   | 44.4   | 79.1 | 26.6 | 33.7 | 5.1 | 6.9  | 23.5 | 32.1 | 12.7 | 8.0  |
| R080062   | 30-45 | 3        | 13.4 | 4.99 | 13.1 | 39.1 | 243 | 4.2   | 31.7   | 78.3 | 26.3 | 33.6 | 3.6 | 5.6  | 26.8 | 41.5 | 13.3 | 8.5  |
| R080062   | 30-45 | 6        | 19.1 | 4.21 | 10.9 | 32.8 | 306 | 4.3   | 22.3   | 77.7 | 25.9 | 33.3 | 2.4 | 12.5 | 12.4 | 65.3 | 13.4 | 8.8  |
| R080062   | 30-45 | 10       | 18.0 | 4.35 | 11.0 | 33.0 | 259 | 4.6   | 25.4   | 75.9 | 25.4 | 33.4 | 0.7 | 12.8 | 3.7  | 70.9 | 12.9 | 9.2  |
| R080062   | 30-45 | 14       | 10.2 | 4.03 | 10.2 | 31.1 | 474 | 5.1   | 50.1   | 77.1 | 25.3 | 32.8 | 0.7 | 4.4  | 7.1  | 42.8 | 12.9 | 8.9  |
| R080062   | 30-45 | 21       | 10.2 | 3.99 | 10.2 | 30.9 | 472 | 5.0   | 48.8   | 77.4 | 25.6 | 33.1 | 2.6 | 2.6  | 25.7 | 25.5 | 13.8 | 8.7  |
| R080062   | 30-45 | 28       | 14.5 | 4.19 | 10.5 | 32.6 | 323 | 5.9   | 40.4   | 77.7 | 25.2 | 32.4 | 2.2 | 6.4  | 15.3 | 44.3 | 13.7 | 8.5  |
| 0806012   | 24 h  | Prebleed | 3.7  | 4.78 | 12.1 | 35.7 | 240 | 2.1   | 57.0   | 74.8 | 25.2 | 33.8 | 0.2 | 1.4  | 5.9  | 37.1 | 14.1 | 7.5  |
| 0806012   | 24 h  | 3        | 3.38 | 4.49 | 11.1 | 32.9 | 240 | 2.2   | 56.8   | 73.2 | 24.8 | 33.9 | 0.4 | 1.2  | 10.4 | 32.8 | 12.9 | 8.3  |
| 0806012   | 24 h  | 6        | 4.1  | 3.84 | 9.7  | 29.0 | 261 | 2.0   | 48.1   | 75.4 | 25.3 | 33.5 | 0.3 | 1.8  | 7.5  | 44.4 | 14.2 | 7.4  |
| 0806012   | 24 h  | 10       | 5.9  | 3.89 | 9.7  | 29.5 | 343 | 3.4   | 57.2   | 75.8 | 24.9 | 32.9 | 0.6 | 1.9  | 10.5 | 32.3 | 15.6 | 7.7  |
| 0806012   | 24 h  | 14       | 6.0  | 4.44 | 10.9 | 33.1 | 478 | 4.3   | 71.2   | 74.5 | 24.6 | 33.1 | 0.4 | 1.3  | 6.6  | 22.2 | 15.9 | 7.5  |
| 0806012   | 24 h  | 21       | 4.5  | 4.45 | 11.2 | 33.1 | 302 | 2.8   | 63.2   | 74.3 | 25.0 | 33.7 | 0.4 | 1.2  | 9.2  | 27.6 | 14.8 | 7.8  |
| 0806012   | 24 h  | 28       | 4.1  | 4.17 | 10.4 | 30.8 | 211 | 3.2   | 77.3   | 73.9 | 25.0 | 33.8 | 0.2 | 0.8  | 3.8  | 18.9 | 14.6 | 7.7  |
| 0704019   | 24 h  | Prebleed | 3.7  | 5.02 | 13.7 | 37.5 | 181 | 2.4   | 66.1   | 74.8 | 27.3 | 36.5 | 0.2 | 1.1  | 4.7  | 29.2 | 13.3 | 10.2 |
| 0704019   | 24 h  | 3        | 18.4 | 5.43 | 13.7 | 40.1 | 219 | 2.0   | 10.9   | 73.9 | 25.2 | 34.1 | 0.8 | 15.6 | 4.1  | 85.0 | 13.5 | 10.0 |
| 0704019   | 24 h  | 6        | 4.3  | 4.27 | 10.7 | 31.3 | 245 | 2.2   | 51.8   | 73.3 | 25.0 | 34.0 | 0.4 | 1.7  | 8.6  | 39.6 | 13.9 | 10.1 |
| 0704019   | 24 h  | 10       | 3.9  | 4.45 | 11.0 | 32.1 | 359 | 2.6   | 67.5   | 72.1 | 24.7 | 34.3 | 0.3 | 1.0  | 7.8  | 24.7 | 13.9 | 8.6  |
| 0704019   | 24 h  | 14       | 3.8  | 4.77 | 11.7 | 34.3 | 260 | 2.5   | 66.6   | 71.9 | 24.6 | 34.2 | 0.2 | 1.1  | 4.8  | 28.6 | 13.7 | 9.8  |
| 0704019   | 24 h  | 21       | 2.4  | 4.35 | 10.6 | 31.1 | 230 | 1.6   | 64.5   | 71.4 | 24.4 | 34.2 | 0.3 | 0.6  | 11.7 | 23.8 | 13.1 | 10.1 |
| 0704019   | 24 h  | 28       | 2.6  | 5.04 | 12.2 | 36.5 | 172 | 1.7   | 66.6   | 72.4 | 24.2 | 33.4 | 0.2 | 0.7  | 5.9  | 27.5 | 12.9 | 10.2 |
| 0908021   | 24 h  | Prebleed | 5.9  | 4.45 | 12.0 | 32.6 | 339 | 4.8   | 80.7   | 73.1 | 26.9 | 36.9 | 0.3 | 0.9  | 4.3  | 15.0 | 12.3 | 7.0  |
| 0908021   | 24 h  | 3        | 3.9  | 4.29 | 11.0 | 32.4 | 250 | 2.5   | 63.0   | 75.4 | 25.6 | 33.9 | 0.4 | 1.0  | 11.3 | 25.7 | 13.9 | 7.5  |
| 0908021   | 24 h  | 6        | 4.7  | 4.11 | 10.4 | 30.0 | 381 | 3.5   | 74.8   | 73.1 | 25.2 | 34.5 | 0.5 | 0.7  | 11.0 | 14.2 | 12.6 | 6.8  |
| 0908021   | 24 h  | 10       | 5.0  | 4.21 | 10.6 | 31.4 | 350 | 4.0   | 80.2   | 74.6 | 25.2 | 33.7 | 0.4 | 0.6  | 8.8  | 11.0 | 13.1 | 6.6  |
| 0908021   | 24 h  | 14       | 5.7  | 4.03 | 10.0 | 29.0 | 393 | 4.7   | 82.9   | 72.0 | 24.9 | 34.6 | 0.5 | 0.5  | 8.1  | 9.0  | 13.3 | 7.1  |
| 0908021   | 24 h  | 21       | 5.7  | 3.96 | 10.0 | 29.4 | 388 | 4.9   | 86.0   | 74.3 | 25.2 | 33.9 | 0.4 | 0.4  | 6.8  | 7.2  | 12.5 | 7.0  |
| 0908021   | 24 h  | 28       | 4.1  | 3.88 | 9.7  | 28.3 | 361 | 3.4   | 82.2   | 73.0 | 24.9 | 34.2 | 0.3 | 0.4  | 8.0  | 9.8  | 13.2 | 7.0  |
| 08R0002   | 24 h  | Prebleed | 3.9  | 4.90 | 11.9 | 35.5 | 226 | 2.2   | 56.8   | 72.5 | 24.3 | 33.5 | 0.3 | 1.4  | 8.5  | 34.7 | 13.3 | 9.2  |
| 08R0002   | 24 h  | 3        | 5.3  | 3.98 | 10.1 | 28.7 | 386 | 4.3   | 81.0   | 72.0 | 25.3 | 35.1 | 0.6 | 0.4  | 11.2 | 7.8  | 12.6 | 6.9  |
| 08R0002   | 24 h  | 6        | 13.9 | 4.24 | 10.5 | 30.9 | 173 | 3.2   | 22.7   | 72.9 | 24.7 | 33.9 | 0.3 | 10.5 | 2.1  | 75.2 | 13.1 | 8.9  |
| 08R0002   | 24 h  | 10       | 12.9 | 4.62 | 11.5 | 33.1 | 304 | 3.4   | 26.3   | 71.6 | 25.0 | 34.9 | 0.9 | 8.6  | 7.2  | 66.5 | 13.6 | 9.3  |
| 08R0002   | 24 h  | 14       | 5.8  | 4.46 | 10.6 | 32.5 | 370 | 3.8   | 66.0   | 72.8 | 23.8 | 32.7 | 0.5 | 1.5  | 8.4  | 25.6 | 12.9 | 9.2  |
| 08R0002   | 24 h  | 21       | 5.3  | 4.68 | 11.5 | 33.5 | 334 | 3.5   | 65.4   | 71.6 | 24.7 | 34.5 | 1.1 | 0.7  | 20.6 | 14.0 | 13.1 | 8.7  |
| 08R0002   | 24 h  | 28       | 3.4  | 4.75 | 11.5 | 34.1 | 178 | 2.1   | 62.6   | 71.8 | 24.2 | 33.6 | 0.3 | 1.0  | 9.3  | 28.1 | 13.4 | 9.1  |
| 0904047   | 48 h  | Prebleed | 8.4  | 5.53 | 12.9 | 38.3 | 268 | 6.5   | 77.2   | 69.2 | 23.3 | 33.6 | 0.4 | 1.5  | 5.0  | 17.8 | 12.9 | 9.6  |
| 0904047   | 48 h  | 3        | 13.1 | 5.36 | 12.5 | 36.9 | 288 | 4.6   | 35.1   | 68.7 | 23.3 | 33.9 | 0.9 | 7.6  | 7.2  | 57.7 | 12.9 | 9.4  |
| 0904047   | 48 h  | 6        | 13.1 | 4.73 | 11.1 | 32.5 | 250 | 5.0   | 37.9   | 68.7 | 23.4 | 34.0 | 0.7 | 7.4  | 5.5  | 56.6 | 13.1 | 10.0 |

| Subj. No. | Group | Day PI   | WBC  | RBC  | HgB  | HCT  | PLT | Lymph | %Lymph | MCV  | MCH  | MCHC | MO  | GR   | %MO  | %GR  | %RDW | MPV  |
|-----------|-------|----------|------|------|------|------|-----|-------|--------|------|------|------|-----|------|------|------|------|------|
| 0904047   | 48 h  | 10       | 8.6  | 4.93 | 11.5 | 33.5 | 405 | 6.4   | 74.8   | 68.0 | 23.3 | 34.2 | 0.8 | 1.4  | 9.3  | 15.9 | 13.7 | 10.4 |
| 0904047   | 48 h  | 14       | 12.3 | 5.03 | 11.7 | 34.5 | 447 | 8.9   | 72.5   | 68.6 | 23.4 | 34.1 | 1.1 | 2.3  | 8.9  | 18.6 | 13.9 | 8.9  |
| 0904047   | 48 h  | 21       | 10.1 | 5.13 | 12.1 | 35.3 | 359 | 7.9   | 78.2   | 68.7 | 23.5 | 34.2 | 0.8 | 1.4  | 7.9  | 13.9 | 14.1 | 9.3  |
| 0904047   | 48 h  | 28       | 9.4  | 5.45 | 12.4 | 37.2 | 357 | 7.3   | 77.8   | 68.3 | 22.8 | 33.4 | 0.7 | 1.4  | 7.6  | 14.6 | 14.1 | 9.0  |
| 1002065   | 48 h  | Prebleed | 11.7 | 4.61 | 11.4 | 33.8 | 221 | 9.0   | 76.8   | 73.3 | 24.7 | 33.8 | 0.6 | 2.1  | 5.4  | 17.8 | 13.1 | 9.0  |
| 1002065   | 48 h  | 3        | 11.7 | 4.60 | 11.3 | 33.3 | 238 | 8.8   | 74.8   | 72.5 | 24.7 | 34.0 | 1.1 | 1.9  | 9.0  | 16.2 | 13.4 | 9.5  |
| 1002065   | 48 h  | 6        | 13.5 | 4.28 | 10.5 | 30.6 | 207 | 7.5   | 55.7   | 71.5 | 24.4 | 34.1 | 1.3 | 4.6  | 9.9  | 34.4 | 13.5 | 9.6  |
| 1002065   | 48 h  | 10       | 9.5  | 4.33 | 10.5 | 30.8 | 296 | 7.2   | 75.7   | 71.2 | 24.4 | 34.2 | 1.0 | 1.3  | 10.9 | 13.4 | 14.0 | 8.9  |
| 1002065   | 48 h  | 14       | 14.4 | 4.65 | 11.4 | 33.6 | 300 | 10.5  | 72.9   | 72.2 | 24.6 | 34.0 | 0.9 | 3.0  | 6.2  | 20.9 | 14.6 | 9.4  |
| 1002065   | 48 h  | 21       | 14.5 | 4.91 | 12.0 | 35.1 | 299 | 11.6  | 80.3   | 71.4 | 24.4 | 34.1 | 0.7 | 2.2  | 4.6  | 15.1 | 13.8 | 9.4  |
| 1002065   | 48 h  | 28       | 12.2 | 4.72 | 11.4 | 33.4 | 270 | 9.5   | 77.6   | 70.8 | 24.1 | 34.0 | 0.7 | 2.0  | 5.6  | 16.8 | 13.7 | 9.1  |
| 0705010   | 48 h  | Prebleed | 4.4  | 5.1  | 13.5 | 39.5 | 368 | 2.8   | 62.8   | 77.4 | 26.4 | 34.1 | 0.5 | 2.1  | 11.4 | 25.8 | 12.5 | 8.7  |
| 0705010   | 48 h  | 3        | 5.9  | 5.23 | 13.6 | 40.5 | 389 | 3.0   | 51.0   | 77.3 | 25.9 | 33.5 | 0.5 | 2.4  | 8.7  | 40.3 | 12.4 | 9.1  |
| 0705010   | 48 h  | 6        | 22.7 | 5.07 | 13.4 | 38.3 | 356 | 2.4   | 10.7   | 75.6 | 26.5 | 35.1 | 1.5 | 18.7 | 6.8  | 82.5 | 12.2 | 9.1  |
| 0705010   | 48 h  | 10       | 10.5 | 4.17 | 10.7 | 32.1 | 605 | 6.2   | 59.1   | 77.0 | 25.7 | 33.4 | 0.5 | 3.8  | 4.7  | 36.2 | 12.6 | 7.4  |
| 0705010   | 48 h  | 14       | 9.8  | 4.26 | 11.0 | 33.2 | 424 | 3.8   | 38.7   | 77.8 | 25.9 | 33.3 | 1.0 | 5.0  | 9.8  | 51.5 | 13.9 | 8.6  |
| 0705010   | 48 h  | 21       | 9.9  | 4.54 | 11.8 | 35.3 | 679 | 5.7   | 57.5   | 77.8 | 26.1 | 33.5 | 0.9 | 3.3  | 9.2  | 33.3 | 13.4 | 8.7  |
| 0705010   | 48 h  | 28       | 6.6  | 5.13 | 12.9 | 39.7 | 456 | 3.9   | 59.0   | 77.4 | 25.1 | 32.5 | 0.8 | 1.9  | 11.5 | 29.5 | 13.4 | 8.5  |
| 0904088   | 48 h  | Prebleed | 8.8  | 4.64 | 11.7 | 35.0 | 214 | 7.2   | 81.3   | 75.4 | 25.3 | 33.5 | 0.6 | 1.0  | 7.1  | 11.6 | 12.5 | 10.2 |
| 0904088   | 48 h  | 3        | 7.0  | 4.57 | 11.6 | 33.9 | 236 | 5.3   | 75.8   | 74.1 | 25.4 | 34.3 | 0.6 | 1.0  | 9.2  | 15.0 | 12.4 | 10.1 |
| 0904088   | 48 h  | 6        | 6.7  | 4.87 | 12.3 | 36.1 | 271 | 5.2   | 77.4   | 74.2 | 25.2 | 34.0 | 0.6 | 0.9  | 9.0  | 13.6 | 12.4 | 10.2 |
| 0904088   | 48 h  | 10       | 6.7  | 4.48 | 11.2 | 32.0 | 241 | 4.5   | 67.8   | 73.4 | 25.0 | 34.1 | 0.4 | 1.7  | 6.5  | 25.7 | 12.2 | 10.4 |
| 0904088   | 48 h  | 14       | 9.4  | 4.77 | 11.9 | 35.4 | 368 | 7.3   | 78.1   | 74.2 | 24.0 | 33.6 | 1.0 | 1.0  | 10.8 | 11.1 | 12.7 | 9.8  |
| 0904088   | 48 h  | 21       | 12.5 | 4.99 | 12.6 | 37.4 | 304 | 7.1   | 56.8   | 74.9 | 25.1 | 33.6 | 1.6 | 3.8  | 12.8 | 30.4 | 13.0 | 10.6 |
| 0904088   | 48 h  | 28       | 8.9  | 4.86 | 11.9 | 35.9 | 236 | 7.1   | 79.3   | 74.0 | 24.5 | 33.1 | 1.1 | 0.8  | 12.0 | 8.7  | 13.3 | 10.1 |
| 0906220   | 72 h  | Prebleed | 7.9  | 4.80 | 12.3 | 35.3 | 288 | 4.3   | 54.6   | 73.6 | 25.7 | 34.8 | 0.8 | 2.8  | 10.2 | 35.2 | 11.9 | 9.3  |
| 0906220   | 72 h  | 3        | 10.9 | 5.06 | 12.3 | 37.3 | 276 | 3.8   | 34.5   | 73.7 | 24.4 | 33.1 | 1.2 | 6.0  | 10.9 | 54.6 | 12.6 | 9.3  |
| 0906220   | 72 h  | 6        | 22.0 | 5.41 | 13.5 | 39.1 | 196 | 3.5   | 15.8   | 72.3 | 24.9 | 34.4 | 1.3 | 17.3 | 5.7  | 78.5 | 11.9 | 9.3  |
| 0906220   | 72 h  | 10       | 8.5  | 4.40 | 10.8 | 31.3 | 131 | 4.2   | 49.2   | 71.2 | 24.5 | 34.3 | 0.5 | 3.8  | 6.0  | 44.8 | 12.0 | 9.6  |
| 0906220   | 72 h  | 14       | 11.9 | 4.79 | 11.6 | 34.3 | 196 | 7.6   | 64.2   | 71.6 | 24.3 | 33.9 | 1.0 | 3.3  | 8.3  | 27.5 | 13.1 | 9.1  |
| 0906220   | 72 h  | 21       | 11.4 | 4.25 | 10.3 | 30.5 | 330 | 6.7   | 59.2   | 71.8 | 24.1 | 33.6 | 1.2 | 3.5  | 10.3 | 30.5 | 13.5 | 8.6  |
| 0906220   | 72 h  | 28       | 14.9 | 4.72 | 11.3 | 33.2 | 381 | 9.5   | 63.7   | 70.4 | 24.0 | 34.1 | 1.5 | 3.9  | 10.3 | 26.0 | 13.1 | 8.5  |
| 0810254   | 72 h  | Prebleed | 10.6 | 5.00 | 13.1 | 38.2 | 313 | 4.4   | 41.8   | 76.2 | 26.2 | 34.3 | 0.7 | 5.4  | 6.9  | 51.3 | 12.9 | 10.1 |
| 0810254   | 72 h  | 3        | 10.6 | 5.52 | 13.7 | 41.9 | 319 | 4.4   | 41.8   | 75.8 | 24.8 | 32.7 | 1.0 | 5.2  | 9.4  | 48.8 | 13.3 | 10.4 |
| 0810254   | 72 h  | 6        | 7.2  | 4.20 | 10.4 | 31.2 | 207 | 3.4   | 33.1   | 74.3 | 24.8 | 33.4 | 1.4 | 3.4  | 19.2 | 47.7 | 12.4 | 10.3 |
| 0810254   | 72 h  | 10       | 18.6 | 4.72 | 11.8 | 34.5 | 147 | 6.3   | 33.9   | 73.0 | 24.9 | 34.2 | 1.2 | 11.1 | 6.6  | 59.5 | 12.3 | 9.4  |
| 0810254   | 72 h  | 14       | 18.3 | 4.94 | 12.1 | 36.3 | 247 | 9.6   | 52.3   | 73.4 | 24.6 | 33.5 | 2.0 | 6.7  | 11.0 | 36.7 | 13.2 | 10.5 |
| 0810254   | 72 h  | 21       | 18.7 | 4.59 | 11.5 | 34.7 | 513 | 9.7   | 51.8   | 75.4 | 25.1 | 33.2 | 1.9 | 7.2  | 9.9  | 38.3 | 16.2 | 9.8  |
| 0810254   | 72 h  | 28       | 17.8 | 4.93 | 12.4 | 36.7 | 413 | 8.9   | 49.8   | 74.3 | 25.1 | 33.8 | 2.0 | 6.9  | 11.5 | 38.7 | 15.2 | 8.8  |

| Subj. No. | Group | Day PI   | WBC  | RBC  | HgB  | HCT  | PLT | Lymph | %Lymph | MCV  | MCH  | MCHC | MO  | GR   | %MO  | %GR  | %RDW | MPV |
|-----------|-------|----------|------|------|------|------|-----|-------|--------|------|------|------|-----|------|------|------|------|-----|
| 0906145   | 72 h  | Prebleed | 10.3 | 5.52 | 15.0 | 41.1 | 259 | 5.3   | 51.5   | 74.5 | 27.2 | 36.5 | 0.6 | 4.4  | 5.7  | 42.8 | 13.3 | 9.3 |
| 0906145   | 72 h  | 3        | 9.3  | 5.31 | 13.3 | 39.8 | 260 | 6.8   | 73.6   | 75.0 | 25.1 | 33.5 | 1.0 | 1.5  | 10.3 | 16.1 | 14.1 | 8.9 |
| 0906145   | 72 h  | 6        | 6.7  | 4.72 | 11.9 | 34.9 | 142 | 4.3   | 64.9   | 73.9 | 25.1 | 34.0 | 0.4 | 2.0  | 5.6  | 29.5 | 13.2 | 9.2 |
| 0906145   | 72 h  | 10       | 55.4 | 4.68 | 12.0 | 34.8 | 159 | 7.1   | 12.8   | 74.4 | 25.7 | 34.5 | 6.4 | 41.9 | 11.6 | 75.6 | 13.5 | 8.9 |
| 0906145   | 72 h  | 14       | 9.4  | 4.75 | 12.0 | 35.6 | 114 | 5.6   | 60.1   | 74.9 | 25.3 | 33.7 | 1.8 | 2.0  | 18.9 | 21.0 | 14.2 | 8.7 |
| 0906145   | 72 h  | 21       | 14.2 | 4.73 | 12.1 | 35.9 | 387 | 6.7   | 47.3   | 75.9 | 25.6 | 33.7 | 1.8 | 5.7  | 12.9 | 39.8 | 18.4 | 7.5 |
| 0906145   | 72 h  | 28       | 12.9 | 4.81 | 12.3 | 36.3 | 358 | 7.9   | 60.9   | 75.4 | 25.6 | 33.9 | 1.9 | 3.1  | 15.0 | 24.1 | 16.8 | 7.7 |
| 0807175   | 72 h  | Prebleed | 6.5  | 5.56 | 14.7 | 41.1 | 270 | 4.4   | 67.3   | 74.0 | 26.3 | 35.6 | 0.3 | 1.8  | 4.6  | 28.1 | 13.7 | 8.2 |
| 0807175   | 72 h  | 3        | 6.9  | 5.15 | 12.6 | 38.2 | 270 | 3.5   | 50.4   | 74.2 | 24.5 | 33.0 | 0.6 | 2.9  | 8.2  | 41.4 | 13.7 | 7.9 |
| 0807175   | 72 h  | 6        | 9.9  | 4.73 | 11.9 | 34.2 | 278 | 4.9   | 49.0   | 72.4 | 25.3 | 34.9 | 0.4 | 4.7  | 4.0  | 47.0 | 13.9 | 9.5 |
| 0807175   | 72 h  | 10       | 13.8 | 4.72 | 11.5 | 33.6 | 121 | 5.8   | 42.0   | 71.2 | 24.4 | 34.2 | 1.0 | 7.0  | 7.5  | 50.5 | 13.9 | 8.8 |
| 0807175   | 72 h  | 14       | 10.4 | 4.36 | 10.5 | 31.7 | 263 | 7.1   | 68.2   | 72.7 | 24.1 | 33.2 | 1.0 | 2.3  | 9.5  | 22.3 | 15.6 | 7.4 |
| 0807175   | 72 h  | 21       | 11.2 | 4.50 | 11.1 | 33.2 | 576 | 6.5   | 58.3   | 73.9 | 24.6 | 33.3 | 1.1 | 3.6  | 10.0 | 31.7 | 19.1 | 7.1 |
| 0807175   | 72 h  | 28       | 12.6 | 4.57 | 11.2 | 33.3 | 363 | 6.4   | 50.4   | 72.9 | 24.5 | 33.5 | 1.0 | 5.3  | 7.6  | 42.0 | 17.6 | 8.0 |

---

WBC, white blood cell count; RBC, red blood cell count; HgB, hemoglobin; HCT; hematocrit; PLT, platelet count; Lymph, lymphocyte count; %Lymph, percent lymphocytes; MCV, mean corpuscular volume; MCH, mean corpuscular hemoglobin; MCHC, mean corpuscular hemoglobin concentration; MO, monocyte count; GR, granulocyte count; %MO, percent monocytes; %GR, percent granulocytes; RDW, red blood cell distribution width; MPV, mean platelet volume

**Supplementary Table 2: Clinical chemistry results.**

| Subj. No. | Group   | Day PI   | GLU | BUN | CRE | UA   | CA   | ALB | TP  | ALT   | AST   | ALP  | GGT | AMY | CRP   |
|-----------|---------|----------|-----|-----|-----|------|------|-----|-----|-------|-------|------|-----|-----|-------|
| 0308904   | Control | Prebleed | 86  | 13  | 0.8 | <0.3 | 9.6  | 3.5 | 7.4 | 49    | 26    | 100  | 46  | 177 | <5.0  |
| 0308904   | Control | 3        | 88  | 12  | 0.7 | <0.3 | 9.7  | 3.4 | 7.2 | 43    | 29    | 95   | 44  | 192 | <5.0  |
| 0308904   | Control | 6        | 64  | 15  | 0.7 | 0.5  | 9.3  | 2.9 | 6.8 | 538   | 1565  | 1289 | 217 | 124 | 24.0  |
| 0904099   | Control | Prebleed | 94  | 15  | 0.9 | <0.3 | 9.9  | 3.4 | 7.5 | 39    | 27    | 303  | 80  | 474 | <5.0  |
| 0904099   | Control | 3        | 78  | 11  | 1.1 | <0.3 | 9.4  | 3.2 | 6.4 | 55    | 33    | 309  | 87  | 409 | <5.0  |
| 0904099   | Control | 6        | 94  | 17  | 1.2 | <0.3 | 9.2  | 3.1 | 6.9 | 75    | 192   | 433  | 92  | 334 | >200  |
| 0904099   | Control | 8        | 45  | 66  | 6.1 | <0.3 | 8.0  | 2.8 | 6.7 | 1016  | >2000 | 766  | 273 | 223 | 53.1  |
| 0707061   | Control | Prebleed | 96  | 13  | 1.1 | <0.3 | 10.1 | 3.4 | 7.1 | 34    | 25    | 270  | 118 | 407 | <5.0  |
| 0707061   | Control | 3        | 91  | 14  | 1.0 | <0.3 | 9.9  | 3.4 | 7.3 | 46    | 23    | 281  | 120 | 363 | <5.0  |
| 0707061   | Control | 6        | 86  | 15  | 1.2 | <0.3 | 9.4  | 3.0 | 7.4 | 29    | 44    | 271  | 104 | 233 | >200  |
| 0707061   | Control | 9        | 33  | 39  | 3.3 | 0.7  | 8.5  | 2.6 | 5.9 | 628   | 1801  | 197  | 217 | 114 | >200  |
| 0907042   | Control | Prebleed | 79  | 16  | 0.8 | <0.3 | 9.8  | 3.8 | 7.0 | 24    | 17    | 109  | 41  | 254 | <5.0  |
| 0907042   | Control | 3        | 80  | 19  | 1.0 | <0.3 | 9.3  | 3.6 | 7.0 | 32    | 29    | 118  | 40  | 226 | <5.0  |
| 0907042   | Control | 6        | 77  | 17  | 1.2 | <0.3 | 9.1  | 2.6 | 6.3 | 40    | 120   | 360  | 37  | 330 | 192.7 |
| 0907042   | Control | 8        | 56  | 20  | 0.7 | 0.7  | 9.2  | 2.3 | 6.2 | 1801  | >2000 | 1325 | 208 | 96  | 154.6 |
| 0903269   | Control | Prebleed | 78  | 17  | 1.2 | <0.3 | 9.8  | 3.6 | 7.2 | 41    | 34    | 175  | 75  | 289 | <5.0  |
| 0903269   | Control | 3        | 73  | 21  | 1.4 | <0.3 | 9.8  | 3.7 | 7.3 | 43    | 32    | 178  | 74  | 252 | 5.7   |
| 0903269   | Control | 6        | 82  | 12  | 1.1 | <0.3 | 9.4  | 2.8 | 6.8 | 253   | 874   | 842  | 103 | 210 | 185.2 |
| 0903269   | Control | 8        | 15  | 27  | 4.1 | 0.8  | 7.3  | 2.2 | 5.5 | >2000 | >2000 | 2231 | 341 | 125 | 121.5 |
| 0908097   | 30-45   | Prebleed | 85  | 19  | 0.7 | <0.3 | 9.8  | 3.5 | 6.6 | 46    | 28    | 507  | 44  | 608 | <5.0  |
| 0908097   | 30-45   | 3        | 94  | 12  | 1.2 | <0.3 | 9.2  | 2.6 | 6.4 | 56    | 44    | 391  | 36  | 454 | 120.9 |
| 0908097   | 30-45   | 6        | 87  | 27  | 1.0 | <0.3 | 9.3  | 2.2 | 5.8 | 59    | 58    | 366  | 42  | 501 | 109.8 |
| 0908097   | 30-45   | 10       | 73  | 13  | 0.6 | <0.3 | 9.4  | 2.5 | 5.7 | 48    | 37    | 421  | 51  | 429 | 22.6  |
| 0908097   | 30-45   | 14       | 76  | 13  | 0.7 | <0.3 | 9.1  | 2.2 | 5.8 | 37    | 36    | 390  | 44  | 499 | 85.8  |
| 0908097   | 30-45   | 21       | 77  | 16  | 1.0 | <0.3 | 9.9  | 3.0 | 7.4 | 42    | 25    | 255  | 65  | 327 | <5.0  |
| 0908097   | 30-45   | 28       | 80  | 16  | 0.9 | <0.3 | 10.3 | 3.3 | 6.7 | 41    | 20    | 451  | 62  | 509 | <5.0  |
| 08083572  | 30-45   | Prebleed | 74  | 15  | 0.6 | <0.3 | 9.9  | 3.3 | 6.8 | 37    | 30    | 233  | 50  | 345 | <5.0  |
| 08083572  | 30-45   | 3        | 78  | 13  | 0.7 | <0.3 | 9.4  | 3.2 | 6.5 | 60    | 65    | 206  | 47  | 483 | <5.0  |
| 08083572  | 30-45   | 6        | 75  | 17  | 0.7 | <0.3 | 9.5  | 3.3 | 7.0 | 107   | 87    | 219  | 50  | 369 | <5.0  |
| 08083572  | 30-45   | 10       | 69  | 15  | 0.6 | <0.3 | 10.0 | 3.1 | 7.2 | 114   | 89    | 269  | 55  | 399 | <5.0  |
| 08083572  | 30-45   | 14       | 72  | 15  | 0.5 | <0.3 | 10.1 | 3.1 | 7.2 | 74    | 41    | 214  | 56  | 369 | <5.0  |
| 08083572  | 30-45   | 21       | 78  | 17  | 1.0 | <0.3 | 10.2 | 3.3 | 7.1 | 88    | 53    | 194  | 55  | 456 | <5.0  |
| 08083572  | 30-45   | 28       | 80  | 18  | 0.8 | <0.3 | 10.4 | 3.1 | 6.5 | 65    | 43    | 150  | 49  | 362 | <5.0  |
| 0906057   | 30-45   | Prebleed | 72  | 14  | 0.8 | <0.3 | 9.4  | 3.0 | 6.0 | 34    | 18    | 233  | 85  | 277 | <5.0  |
| 0906057   | 30-45   | 3        | 82  | 12  | 0.7 | <0.3 | 9.4  | 2.9 | 6.0 | 51    | 33    | 210  | 84  | 311 | 27.8  |
| 0906057   | 30-45   | 6        | 77  | 12  | 0.9 | <0.3 | 9.4  | 2.8 | 6.0 | 62    | 29    | 188  | 84  | 206 | 89.7  |
| 0906057   | 30-45   | 10       | 68  | 17  | 0.6 | <0.3 | 9.0  | 2.2 | 6.4 | 82    | 39    | 384  | 105 | 258 | 44.9  |
| 0906057   | 30-45   | 14       | 66  | 14  | 0.6 | <0.3 | 9.3  | 2.6 | 6.0 | 47    | 29    | 201  | 103 | 230 | <5.0  |



| Subj. No. | Group | Day PI   | GLU | BUN | CRE | UA   | CA   | ALB | TP  | ALT | AST | ALP | GGT | AMY | CRP   |
|-----------|-------|----------|-----|-----|-----|------|------|-----|-----|-----|-----|-----|-----|-----|-------|
| 0906057   | 30-45 | 21       | 71  | 15  | 0.7 | <0.3 | 9.7  | 2.6 | 5.8 | 39  | 25  | 242 | 107 | 251 | <5.0  |
| 0906057   | 30-45 | 28       | 63  | 17  | 0.8 | <0.3 | 9.1  | 2.7 | 5.9 | 41  | 27  | 202 | 101 | 257 | <5.0  |
| R080062   | 30-45 | Prebleed | 59  | 23  | 0.9 | <0.3 | 9.9  | 3.7 | 7.5 | 31  | 25  | 224 | 55  | 370 | <5.0  |
| R080062   | 30-45 | 3        | 67  | 14  | 0.8 | <0.3 | 9.2  | 2.9 | 6.8 | 57  | 53  | 280 | 49  | 277 | 51.9  |
| R080062   | 30-45 | 6        | 77  | 14  | 0.7 | <0.3 | 9.5  | 2.9 | 7.5 | 47  | 43  | 331 | 59  | 188 | 85.9  |
| R080062   | 30-45 | 10       | 72  | 17  | 0.6 | <0.3 | 8.6  | 2.3 | 7.0 | 68  | 116 | 340 | 63  | 187 | 12.6  |
| R080062   | 30-45 | 14       | 60  | 16  | 0.7 | <0.3 | 9.3  | 2.6 | 7.2 | 57  | 29  | 287 | 61  | 275 | <5.0  |
| R080062   | 30-45 | 21       | 70  | 19  | 0.8 | <0.3 | 9.8  | 2.7 | 6.5 | 43  | 53  | 283 | 47  | 387 | <5.0  |
| R080062   | 30-45 | 28       | 68  | 19  | 0.8 | <0.3 | 10.0 | 3.2 | 7.3 | 47  | 26  | 191 | 60  | 328 | <5.0  |
| 0806012   | 24 h  | Prebleed | 84  | 14  | 0.7 | <1.0 | 9.5  | 3.4 | 7.0 | 68  | 30  | 97  | 51  | 201 | <5.0  |
| 0806012   | 24 h  | 3        | 79  | 14  | 0.8 | <0.3 | 8.9  | 3.1 | 6.7 | 110 | 58  | 107 | 59  | 352 | <5.0  |
| 0806012   | 24 h  | 6        | 72  | 16  | 0.7 | <0.3 | 9.4  | 3.1 | 7.3 | 198 | 134 | 130 | 52  | 198 | 25.0  |
| 0806012   | 24 h  | 10       | 74  | 16  | 0.6 | <0.3 | 9.3  | 2.7 | 7.2 | 287 | 99  | 235 | 98  | 213 | 10.9  |
| 0806012   | 24 h  | 14       | 87  | 15  | 0.8 | <0.3 | 9.7  | 3.0 | 7.9 | 96  | 37  | 207 | 123 | 233 | <5.0  |
| 0806012   | 24 h  | 21       | 107 | 12  | 0.7 | <0.3 | 9.6  | 3.0 | 7.5 | 46  | 24  | 148 | 94  | 305 | <5.0  |
| 0806012   | 24 h  | 28       | 108 | 13  | 1.0 | <0.3 | 9.6  | 3.2 | 7.6 | 57  | 29  | 115 | 80  | 203 | <5.0  |
| 0704019   | 24 h  | Prebleed | 98  | 15  | 1.0 | <0.3 | 9.3  | 3.3 | 6.6 | 86  | 42  | 161 | 125 | 452 | <5.0  |
| 0704019   | 24 h  | 3        | 90  | 15  | 1.1 | 0.5  | 9.6  | 2.7 | 6.4 | 87  | 80  | 198 | 101 | 287 | 130.4 |
| 0704019   | 24 h  | 6        | 77  | 23  | 0.7 | <0.3 | 9.0  | 2.3 | 8.0 | 95  | 79  | 260 | 94  | 308 | 18.3  |
| 0704019   | 24 h  | 10       | 67  | 20  | 0.9 | <0.3 | 9.1  | 2.4 | 6.3 | 84  | 46  | 298 | 124 | 356 | <5.0  |
| 0704019   | 24 h  | 14       | 74  | 21  | 0.8 | <0.3 | 9.2  | 2.6 | 6.4 | 70  | 30  | 264 | 127 | 399 | <5.0  |
| 0704019   | 24 h  | 21       | 83  | 19  | 1.0 | <0.3 | 9.5  | 2.9 | 6.5 | 92  | 40  | 213 | 118 | 473 | <5.0  |
| 0704019   | 24 h  | 28       | 84  | 20  | 1.1 | <0.3 | 9.2  | 2.9 | 6.3 | 110 | 46  | 173 | 111 | 462 | <5.0  |
| 0908021   | 24 h  | Prebleed | 100 | 23  | 0.9 | <0.3 | 10.1 | 3.4 | 6.6 | 36  | 23  | 263 | 62  | 308 | <5.0  |
| 0908021   | 24 h  | 3        | 93  | 13  | 0.8 | 0.4  | 9.6  | 3.5 | 7.2 | 64  | 46  | 100 | 49  | 208 | <5.0  |
| 0908021   | 24 h  | 6        | 85  | 29  | 1.1 | <0.3 | 10.1 | 3.3 | 6.5 | 51  | 43  | 229 | 62  | 335 | <5.0  |
| 0908021   | 24 h  | 10       | 76  | 27  | 1.1 | <0.3 | 9.9  | 3.2 | 6.6 | 50  | 43  | 227 | 64  | 319 | <5.0  |
| 0908021   | 24 h  | 14       | 88  | 26  | 1.0 | <0.3 | 9.7  | 3.2 | 6.6 | 40  | 31  | 215 | 63  | 290 | <5.0  |
| 0908021   | 24 h  | 21       | 106 | 25  | 1.0 | <0.3 | 9.9  | 3.2 | 6.6 | 37  | 25  | 225 | 66  | 292 | <5.0  |
| 0908021   | 24 h  | 28       | 81  | 27  | 1.3 | <0.3 | 9.9  | 3.2 | 6.3 | 47  | 28  | 202 | 64  | 280 | <5.0  |
| 08R0002   | 24 h  | Prebleed | 84  | 16  | 0.8 | <0.3 | 9.6  | 3.6 | 7.0 | 80  | 40  | 125 | 64  | 364 | <5.0  |
| 08R0002   | 24 h  | 3        | 88  | 21  | 1.0 | <0.3 | 9.5  | 3.3 | 6.5 | 53  | 49  | 246 | 58  | 606 | <5.0  |
| 08R0002   | 24 h  | 6        | 81  | 27  | 0.6 | <0.3 | 8.7  | 2.1 | 5.9 | 83  | 84  | 232 | 47  | 354 | 159.8 |
| 08R0002   | 24 h  | 10       | 70  | 16  | 0.9 | <0.3 | 8.6  | 2.3 | 6.7 | 66  | 66  | 227 | 60  | 234 | 7.2   |
| 08R0002   | 24 h  | 14       | 72  | 13  | 0.8 | <0.3 | 8.4  | 2.5 | 6.6 | 47  | 36  | 178 | 56  | 348 | <5.0  |
| 08R0002   | 24 h  | 21       | 86  | 14  | 0.7 | <0.3 | 8.8  | 2.7 | 6.6 | 63  | 27  | 156 | 61  | 350 | <5.0  |
| 08R0002   | 24 h  | 28       | 80  | 15  | 0.7 | <0.3 | 8.7  | 2.7 | 6.3 | 73  | 27  | 127 | 58  | 330 | <5.0  |
| 0904047   | 48 h  | Prebleed | 77  | 12  | 0.9 | <0.3 | 9.8  | 3.4 | 7.1 | 44  | 27  | 508 | 104 | 378 | <5.0  |
| 0904047   | 48 h  | 3        | 103 | 13  | 0.8 | <0.3 | 10.0 | 3.3 | 7.1 | 52  | 38  | 512 | 101 | 310 | 118.5 |
| 0904047   | 48 h  | 6        | 102 | 12  | 0.9 | <0.3 | 9.3  | 2.3 | 6.4 | 40  | 53  | 506 | 70  | 221 | 184.1 |

| Subj. No. | Group | Day PI   | GLU | BUN | CRE | UA   | CA   | ALB | TP  | ALT | AST | ALP | GGT | AMY | CRP   |
|-----------|-------|----------|-----|-----|-----|------|------|-----|-----|-----|-----|-----|-----|-----|-------|
| 0904047   | 48 h  | 10       | 100 | 12  | 0.6 | <0.3 | 9.4  | 2.4 | 6.3 | 235 | 89  | 674 | 142 | 300 | 18.2  |
| 0904047   | 48 h  | 14       | 78  | 13  | 0.7 | <0.3 | 9.3  | 2.5 | 6.4 | 63  | 33  | 737 | 153 | 366 | <5.0  |
| 0904047   | 48 h  | 21       | 71  | 10  | 1.0 | <0.3 | 9.7  | 3.0 | 6.6 | 45  | 31  | 273 | 134 | 373 | <5.0  |
| 0904047   | 48 h  | 28       | 77  | 11  | 0.9 | <0.3 | 9.6  | 3.3 | 6.7 | 48  | 31  | 237 | 121 | 307 | <5.0  |
| 1002065   | 48 h  | Prebleed | 87  | 14  | 1.0 | <0.3 | 9.9  | 3.4 | 6.9 | 33  | 24  | 398 | 100 | 417 | <5.0  |
| 1002065   | 48 h  | 3        | 90  | 19  | 0.9 | 0.4  | 9.6  | 3.5 | 6.8 | 39  | 42  | 412 | 96  | 475 | <5.0  |
| 1002065   | 48 h  | 6        | 98  | 16  | 0.9 | <0.3 | 9.5  | 3.0 | 6.8 | 60  | 78  | 316 | 81  | 333 | 163.2 |
| 1002065   | 48 h  | 10       | 84  | 10  | 0.7 | <0.3 | 9.4  | 2.7 | 6.2 | 98  | 59  | 341 | 130 | 345 | <5.0  |
| 1002065   | 48 h  | 14       | 75  | 16  | 0.9 | 0.4  | 9.3  | 2.9 | 6.6 | 48  | 32  | 383 | 141 | 420 | <5.0  |
| 1002065   | 48 h  | 21       | 78  | 14  | 0.9 | 0.4  | 9.3  | 3.1 | 6.9 | 32  | 23  | 374 | 118 | 328 | <5.0  |
| 1002065   | 48 h  | 28       | 78  | 15  | 1.0 | <0.3 | 9.7  | 3.1 | 6.8 | 42  | 25  | 322 | 108 | 307 | <5.0  |
| 0705010   | 48 h  | Prebleed | 92  | 11  | 0.9 | <0.3 | 10.3 | 3.4 | 8.3 | 33  | 25  | 111 | 53  | 431 | <5.0  |
| 0705010   | 48 h  | 3        | 101 | 10  | 0.8 | <0.3 | 10.5 | 3.3 | 7.8 | 53  | 36  | 114 | 53  | 477 | <5.0  |
| 0705010   | 48 h  | 6        | 95  | 13  | 1.0 | <0.3 | 9.9  | 2.5 | 6.7 | 44  | 47  | 208 | 43  | 217 | 168.8 |
| 0705010   | 48 h  | 10       | 77  | 13  | 0.7 | <0.3 | 9.7  | 2.1 | 6.7 | 35  | 75  | 265 | 70  | 417 | 12.0  |
| 0705010   | 48 h  | 14       | 75  | 10  | 0.7 | <0.3 | 9.7  | 2.5 | 6.9 | 37  | 28  | 248 | 51  | 422 | <5.0  |
| 0705010   | 48 h  | 21       | 87  | 10  | 0.6 | <0.3 | 10.5 | 2.8 | 7.4 | 42  | 29  | 218 | 54  | 465 | <5.0  |
| 0705010   | 48 h  | 28       | 84  | 11  | 0.7 | 0.3  | 9.9  | 3.0 | 7.7 | 43  | 25  | 164 | 53  | 456 | <5.0  |
| 0904088   | 48 h  | Prebleed | 86  | 10  | 0.8 | <0.3 | 9.7  | 3.5 | 6.8 | 32  | 26  | 230 | 101 | 338 | <5.0  |
| 0904088   | 48 h  | 3        | 93  | 11  | 1.1 | <0.3 | 9.8  | 3.5 | 7.0 | 47  | 32  | 236 | 97  | 292 | <5.0  |
| 0904088   | 48 h  | 6        | 78  | 11  | 0.8 | <0.3 | 10.0 | 3.4 | 6.9 | 40  | 44  | 230 | 93  | 320 | <5.0  |
| 0904088   | 48 h  | 10       | 86  | 0   | 0.9 | <0.3 | 9.4  | 2.8 | 6.4 | 497 | 302 | 333 | 116 | 276 | 0.3   |
| 0904088   | 48 h  | 14       | 76  | 10  | 0.8 | <0.3 | 9.8  | 2.9 | 6.2 | 5   | 39  | 350 | 154 | 308 | <5.0  |
| 0904088   | 48 h  | 21       | 71  | 10  | 1.0 | <0.3 | 9.7  | 3.0 | 6.6 | 45  | 31  | 273 | 134 | 373 | <5.0  |
| 0904088   | 48 h  | 28       | 77  | 11  | 0.9 | <0.3 | 9.6  | 3.3 | 6.7 | 48  | 31  | 237 | 121 | 307 | <5.0  |
| 0906220   | 72 h  | Prebleed | 103 | 17  | 0.9 | 0.3  | 9.3  | 3.5 | 7.4 | 37  | 26  | 294 | 51  | 335 | <5.0  |
| 0906220   | 72 h  | 3        | 83  | 17  | 1.0 | <0.3 | 9.3  | 3.7 | 7.7 | 42  | 25  | 305 | 52  | 327 | <5.0  |
| 0906220   | 72 h  | 6        | 84  | 11  | 1.2 | <0.3 | 9.1  | 2.8 | 7.0 | 59  | 39  | 274 | 45  | 158 | 188.6 |
| 0906220   | 72 h  | 10       | 72  | 16  | 0.9 | 0.3  | 8.9  | 2.4 | 6.6 | 245 | 182 | 680 | 114 | 214 | 161.3 |
| 0906220   | 72 h  | 14       | 78  | 16  | 0.7 | <0.3 | 9.0  | 2.7 | 6.9 | 99  | 39  | 628 | 168 | 326 | <5.0  |
| 0906220   | 72 h  | 21       | 85  | 16  | 0.6 | <0.3 | 9.7  | 3.1 | 7.5 | 54  | 30  | 418 | 114 | 323 | <5.0  |
| 0906220   | 72 h  | 28       | 106 | 14  | 0.7 | <0.3 | 9.4  | 3.2 | 7.7 | 51  | 27  | 346 | 88  | 337 | <5.0  |
| 0810254   | 72 h  | Prebleed | 88  | 13  | 1.0 | 0.3  | 9.7  | 3.7 | 7.1 | 31  | 22  | 236 | 45  | 423 | <5.0  |
| 0810254   | 72 h  | 3        | 94  | 14  | 0.8 | <0.3 | 9.8  | 3.8 | 7.6 | 47  | 22  | 262 | 48  | 387 | <5.0  |
| 0810254   | 72 h  | 6        | 73  | 10  | 0.8 | <0.3 | 9.3  | 3.2 | 6.7 | 42  | 23  | 201 | 40  | 343 | <5.0  |
| 0810254   | 72 h  | 10       | 71  | 14  | 1.0 | <0.3 | 9.2  | 2.8 | 6.5 | 270 | 444 | 466 | 92  | 260 | 113.3 |
| 0810254   | 72 h  | 14       | 77  | 14  | 0.9 | <0.3 | 9.3  | 2.7 | 7.0 | 54  | 35  | 412 | 86  | 485 | <5.0  |
| 0810254   | 72 h  | 21       | 81  | 10  | 0.6 | <0.3 | 9.4  | 3.1 | 6.7 | 21  | 25  | 257 | 57  | 471 | <5.0  |
| 0810254   | 72 h  | 28       | 89  | 12  | 0.7 | <0.3 | 9.7  | 3.2 | 6.7 | 13  | 18  | 231 | 50  | 489 | <5.0  |

| Subj. No. | Group | Day PI   | GLU | BUN | CRE | UA   | CA  | ALB | TP  | ALT | AST | ALP  | GGT | AMY | CRP   |
|-----------|-------|----------|-----|-----|-----|------|-----|-----|-----|-----|-----|------|-----|-----|-------|
| 0906145   | 72 h  | Prebleed | 104 | 13  | 1.0 | <0.3 | 9.8 | 3.5 | 7.2 | 30  | 27  | 577  | 98  | 399 | <5.0  |
| 0906145   | 72 h  | 3        | 110 | 16  | 1.1 | <0.3 | 9.7 | 3.5 | 7.3 | 25  | 27  | 595  | 95  | 386 | <5.0  |
| 0906145   | 72 h  | 6        | 95  | 20  | 1.0 | <0.3 | 9.3 | 2.5 | 6.3 | 44  | 53  | 461  | 63  | 247 | 170.6 |
| 0906145   | 72 h  | 10       | 60  | 15  | 0.8 | <0.3 | 9.2 | 2.4 | 6.1 | 921 | 561 | 2052 | 194 | 117 | 149.4 |
| 0906145   | 72 h  | 14       | 69  | 17  | 0.9 | <0.3 | 8.5 | 2.2 | 5.8 | 128 | 58  | 1295 | 89  | 349 | <5.0  |
| 0906145   | 72 h  | 21       | 71  | 16  | 0.7 | <0.3 | 9.1 | 2.6 | 7.0 | 37  | 38  | 887  | 90  | 320 | <5.0  |
| 0906145   | 72 h  | 28       | 89  | 15  | 0.8 | <0.3 | 9.7 | 2.8 | 7.0 | 34  | 32  | 586  | 101 | 341 | <5.0  |
| 0807175   | 72 h  | Prebleed | 70  | 16  | 0.9 | <1.0 | 9.8 | 3.7 | 7.6 | 32  | 27  | 328  | 54  | 333 | <5.0  |
| 0807175   | 72 h  | 3        | 97  | 17  | 1.1 | <0.3 | 9.9 | 3.7 | 7.3 | 47  | 24  | 355  | 54  | 429 | <5.0  |
| 0807175   | 72 h  | 6        | 100 | 18  | 1.1 | <0.3 | 9.2 | 2.3 | 6.2 | 45  | 65  | 496  | 37  | 399 | 187.7 |
| 0807175   | 72 h  | 10       | 81  | 23  | 1.1 | <0.3 | 9.0 | 2.1 | 6.1 | 274 | 909 | 938  | 272 | 221 | 151.9 |
| 0807175   | 72 h  | 14       | 81  | 14  | 0.9 | <0.3 | 8.9 | 2.2 | 5.8 | 118 | 86  | 659  | 86  | 505 | 6.6   |
| 0807175   | 72 h  | 21       | 72  | 13  | 0.7 | <0.3 | 9.3 | 2.6 | 5.5 | 49  | 45  | 569  | 64  | 424 | 5.8   |
| 0807175   | 72 h  | 28       | 88  | 15  | 0.6 | <0.3 | 9.4 | 2.5 | 6.5 | 35  | 35  | 410  | 62  | 406 | 7.2   |
